# Supplementary material for: Synergy between Ursolic and Oleanolic Acids from Vitellaria paradoxa Leaf Extract and β-Lactams against Methicillin-Resistant Staphylococcus aureus: In Vitro and In Vivo Activity and Underlying Mechanisms
Source: MDPI journal article supplement (doi:10.3390/molecules22122245), 2017-12-16

## Supplemental material

**Figure 1S.** Isobolograms showing the *in vitro* interaction between the triterpenic acids (UA ■ or OA ●) and ampicillin (A) or oxacillin (B) on the reference strain ATCC33591 and on the four clinical MRSA strains (VUB2,10,20 & 30). Each point corresponds to the fractional inhibitory concentration (FIC) of the triterpenic acid (Y axis) and the FIC of the antibiotic (X axis). Represented data are the mean  $\pm$  SD of three individual experiments.

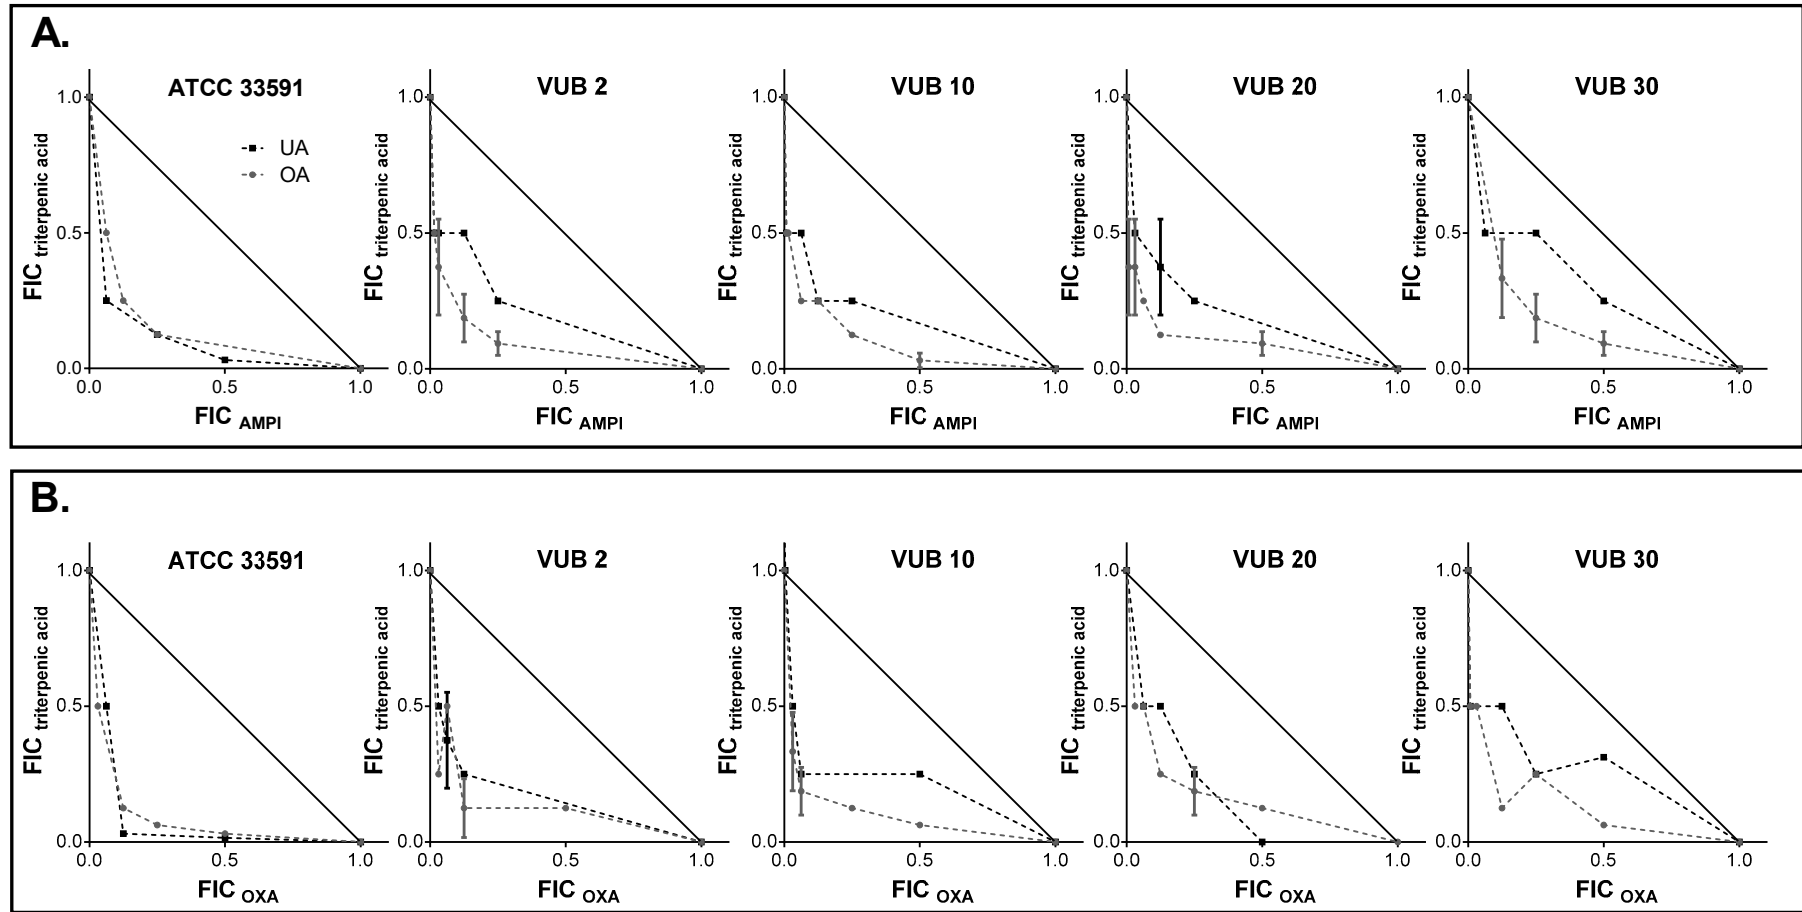

**Figure 2S.** Time-kill curves against MRSA ATCC33591 for the combination of ampicillin (A.) or oxacillin (B.) with four different concentrations of ursolic acid corresponding to the MIC,  $\frac{1}{2}$  x MIC,  $\frac{1}{4}$  x MIC or  $\frac{1}{8}$  x MIC. Represented data are the mean  $\pm$  SD of 3 experiments performed in duplicate.

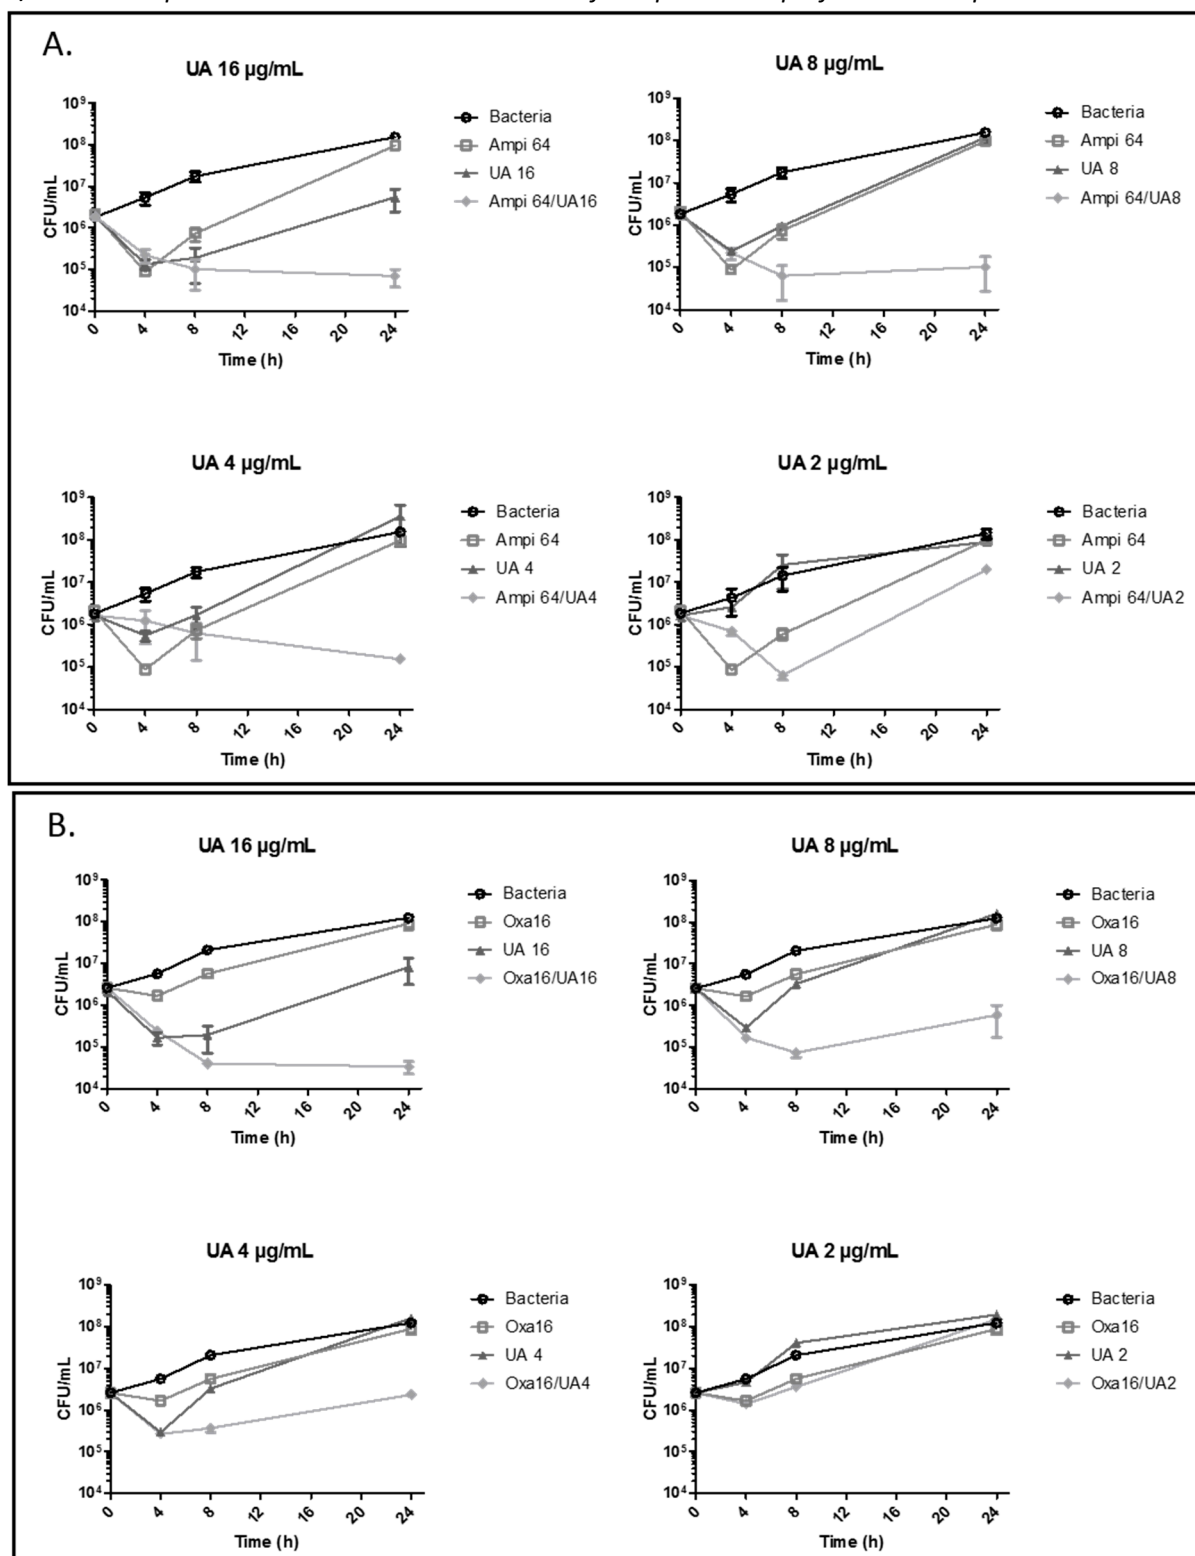

**Figure 3S.** Time-kill curves against MRSA ATCC33591 for the combination of ampicillin (A.) or oxacillin (B.) with four different concentrations of oleanolic acid corresponding to the MIC,  $\frac{1}{2}$  x MIC,  $\frac{1}{4}$  x MIC or  $\frac{1}{8}$  x MIC. Represented data are the mean  $\pm$  SD of 3 experiments performed in duplicate.

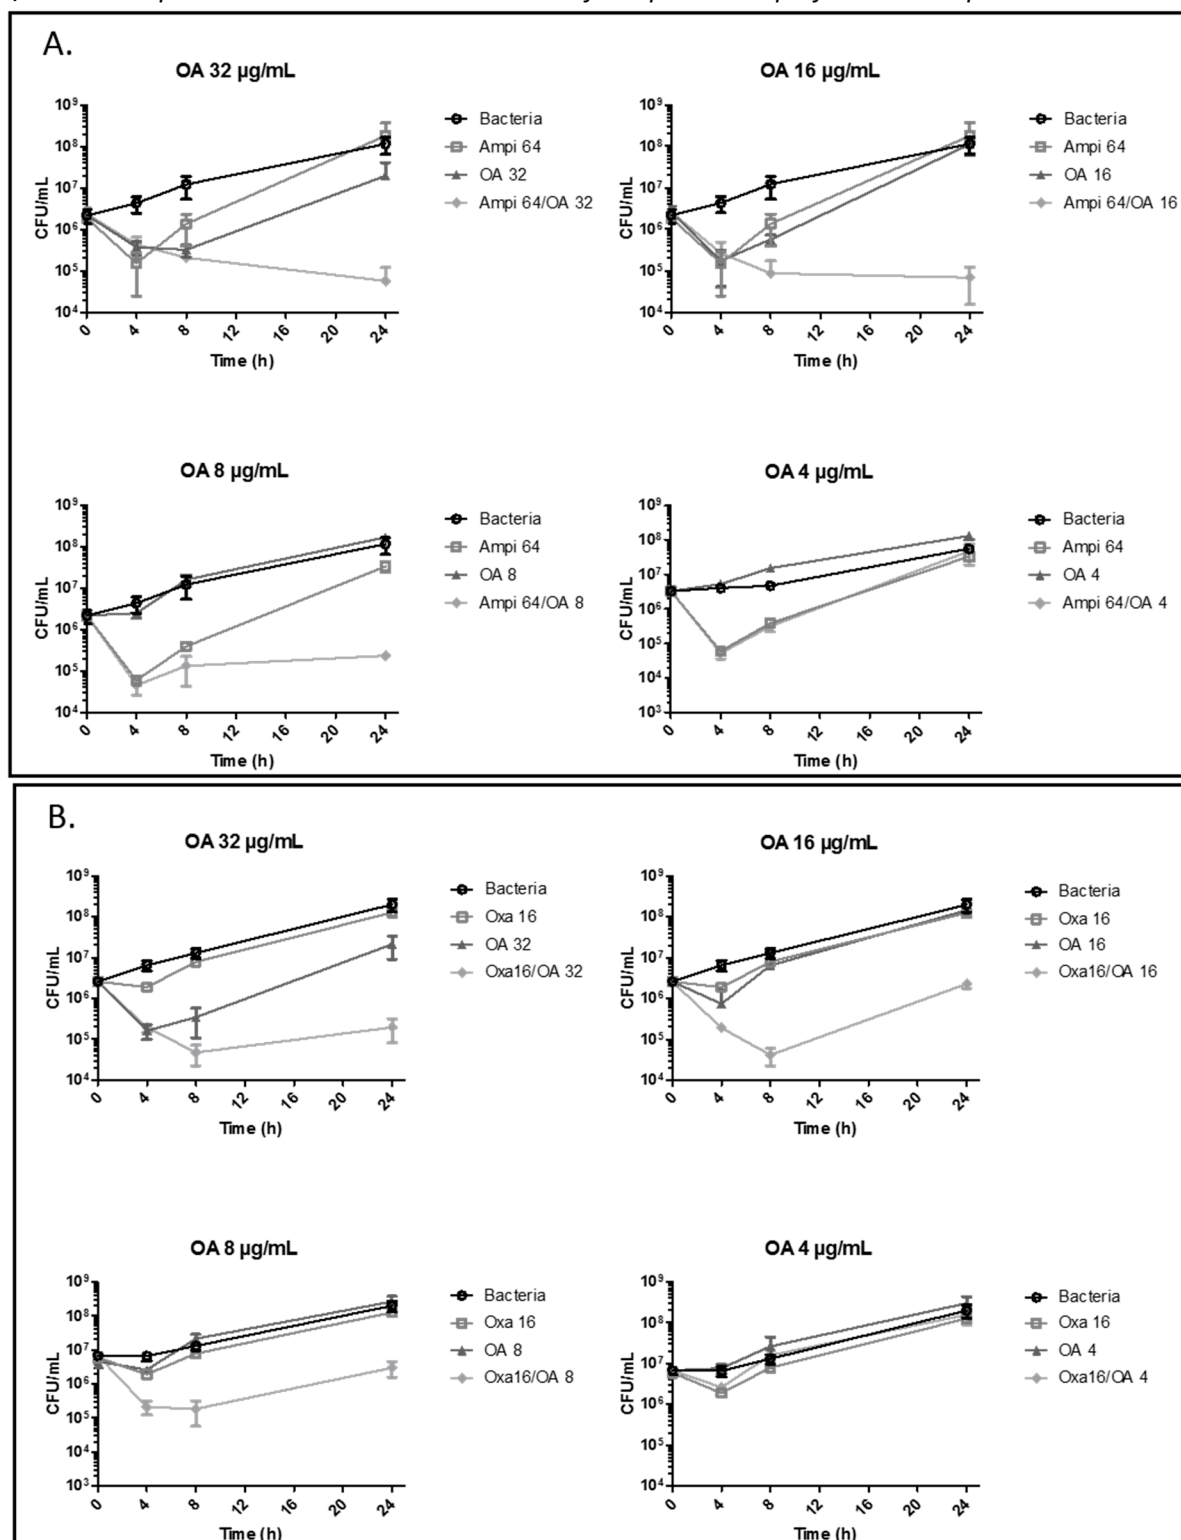

Supplement: s1 [file s1]
